# Supplementary material for: Always Look on Both Sides: Phylogenetic Information Conveyed by Simple Sequence Repeat Allele Sequences
Source: PLoS One. 2012 Jul 13;7(7):e40699. doi: 10.1371/journal.pone.0040699 (PMC3396589; doi:10.1371/journal.pone.0040699)
Supplement: Figure S1 — Complete alignments of DNA fragments for all SSR markers studied. Marker names are shown above each alignment. (PDF) [file pone.0040699.s001.pdf]

## CCT01

1225F\_Cmax\_pum\_Hun  
1225R\_Cmax\_pum\_Hun  
2341F\_Cmax\_pum\_KLY  
2341R\_Cmax\_pum\_KLY  
2355F\_Cmax\_pum\_KaP  
2355R\_Cmax\_pum\_KaP  
2554F\_Ptri\_tri\_Bar  
2554R\_Ptri\_tri\_Bar  
300F\_Cret\_man\_Par  
300R\_Cret\_man\_Par  
3055F\_Cmed\_citr\_Be  
3055R\_Cmed\_citr\_Be  
3056F\_Csp\_pap\_Unn  
3056R\_Csp\_pap\_Unn  
3066F\_Cmax\_pum\_Sou  
3066R\_Cmax\_pum\_Sou  
3237F\_Fjap\_kum\_Unn  
3237R\_Fjap\_kum\_Unn  
3780F\_Chalcithyb\_U  
3780R\_Chalcithyb\_U  
3793F\_Csp\_pap\_Unn  
3793R\_Csp\_pap\_Unn  
3797F\_Csp\_pap\_Unn  
3797R\_Csp\_pap\_Unn  
3816F\_Cret\_man\_KiU  
3816R\_Cret\_man\_KiU  
448F\_Cmax\_pum\_Moa  
448R\_Cmax\_pum\_Moa  
578F\_Cmax\_pum\_Fls  
578R\_Cmax\_pum\_Fls  
644F\_Cmax\_pum\_Phi  
644R\_Cmax\_pum\_Phi  
661F\_Cmed\_cit\_Ind  
661R\_Cmed\_cit\_Ind

cAGG9

[illegible]



## Jc3A10





[illegible]

## Jc3F4

[illegible]

## Jc3H10

p186\_Coun\_1 TTAGACTCTTTAGTGCAGCATGACTCTCTTCTGTCT-----CTCTCTCTCTCTCTCTCTCTCTCTCTCTCTCTCTCTC-----ATACACACACACAGCAGCAGC  
p186\_Coun\_2 TTAGACTCTTTAGTGCAGCATGACTCTCTTCTGTCT-----CTCTCTCTCTCTCTCTCTCTCTCTCTCTCTCTCTCTC-----ATACACACACACAGCAGCAGCAGC  
p216\_Coun\_1 TTAGACTCTTTAGTGCAGCATGACTCTCTTCTGTCT-----CTCTCTCTCTCTCTCTCTCTCTCTCTCTCTC-----ATACACACACACAGCAGCAGCAGC  
p216\_Coun\_2 TTAGACTCTTTAGTGCAGCATGACTCTCTTCTGTCT-----CTCTCTCTCTCTCTCTCTCTCTCTCTCTCTC-----ATACACACACACAGCAGCAGCAGC  
p236\_Coun\_1 TTAGACTCTTTAGTGCAGCATGACTCTCTTCTGTCT-----CTCTCTCTCTCTCTCTCTCTCTCTCTCTCTC-----ATACACACACACAGCAGCAGCAGC  
p236\_Coun\_2 TTAGACTCTTTAGTGCAGCATGACTCTCTTCTGTCT-----CTCTCTCTCTCTCTCTCTCTCTCTCTCTCTC-----ATACACACACACAGCAGCAGCAGC  
p277\_Coun\_1 TTAGACTCTTTAGTGCAGCATGACTCTCTTCTGTCT-----CTCTCTCTCTCTCTCTCTCTCTCTCTCTCTC-----ATACACACACACAGCAGCAGCAGC

[illegible]





[illegible]

QrZAG30
