# Supplementary material for: Always Look on Both Sides: Phylogenetic Information Conveyed by Simple Sequence Repeat Allele Sequences
Source: PubMed Central journal article supplement (PMC3396589; doi:10.1371/journal.pone.0040699), 2012-07-13
Supplement: pone.0040699.s002.pdf [file pone.0040699.s002.pdf]

cAGG9 (Set C)

|                   | SSR  | Amplicon size | FR sequence | Amplicon sequence |
|-------------------|------|---------------|-------------|-------------------|
| SSR               | -    | -             | -           | -                 |
| Amplicon size     | 3381 | -             | -           | -                 |
| FR sequence       | 438  | 1716          | -           | -                 |
| Amplicon sequence | 3976 | 15234         | 2114        | -                 |

Jc3A10 (Set J)

|                   | SSR    | Amplicon size | FR sequence | Amplicon sequence |
|-------------------|--------|---------------|-------------|-------------------|
| SSR               | -      | -             | -           | -                 |
| Amplicon size     | 99287  | -             | -           | -                 |
| FR sequence       | 4723   | 9135          | -           | -                 |
| Amplicon sequence | 140905 | 221320        | 15362       | -                 |

CCT01 (Set C)

|                   | SSR | Amplicon size | FR sequence | Amplicon sequence |
|-------------------|-----|---------------|-------------|-------------------|
| SSR               | -   | -             | -           | -                 |
| Amplicon size     | -   | -             | -           | -                 |
| FR sequence       | -   | 1923          | -           | -                 |
| Amplicon sequence | -   | 8139          | 4190        | -                 |

Jc3F4 (Set J)

|                   | SSR    | Amplicon size | FR sequence | Amplicon sequence |
|-------------------|--------|---------------|-------------|-------------------|
| SSR               | -      | -             | -           | -                 |
| Amplicon size     | 20396  | -             | -           | -                 |
| FR sequence       | 28857  | 63307         | -           | -                 |
| Amplicon sequence | 208873 | 437446        | 79496       | -                 |

GT03 (Set C)

|                   | SSR | Amplicon size | FR sequence | Amplicon sequence |
|-------------------|-----|---------------|-------------|-------------------|
| SSR               | -   | -             | -           | -                 |
| Amplicon size     | -   | -             | -           | -                 |
| FR sequence       | -   | 6670          | -           | -                 |
| Amplicon sequence | -   | 32022         | 10612       | -                 |

Jc3H10 (Set J)

|                   | SSR      | Amplicon size | FR sequence | Amplicon sequence |
|-------------------|----------|---------------|-------------|-------------------|
| SSR               | -        | -             | -           | -                 |
| Amplicon size     | 536254   | -             | -           | -                 |
| FR sequence       | 36187    | 78765         | -           | -                 |
| Amplicon sequence | 71197314 | 2418089       | 326451      | -                 |

QrZAG30 (Set Q)

|                   | SSR    | Amplicon size | FR sequence | Amplicon sequence |
|-------------------|--------|---------------|-------------|-------------------|
| SSR               | -      | -             | -           | -                 |
| Amplicon size     | 131723 | -             | -           | -                 |
| FR sequence       | 106440 | 474646        | -           | -                 |
| Amplicon sequence | 232872 | 812074        | 863056      | -                 |
